# Supplementary material
Source: HighWire-hosted journal article supplement (http://www.cmaj.ca/highwire/filestream/77824/field_highwire_adjunct_files/1/201170-case-2-at.pdf)

**Appendix 2 (as submitted by authors): Supplementary figure**

**Hyperpigmented lesions from chronic ectoparasitosis and subsequent excoriation and scarring (patient 2)**

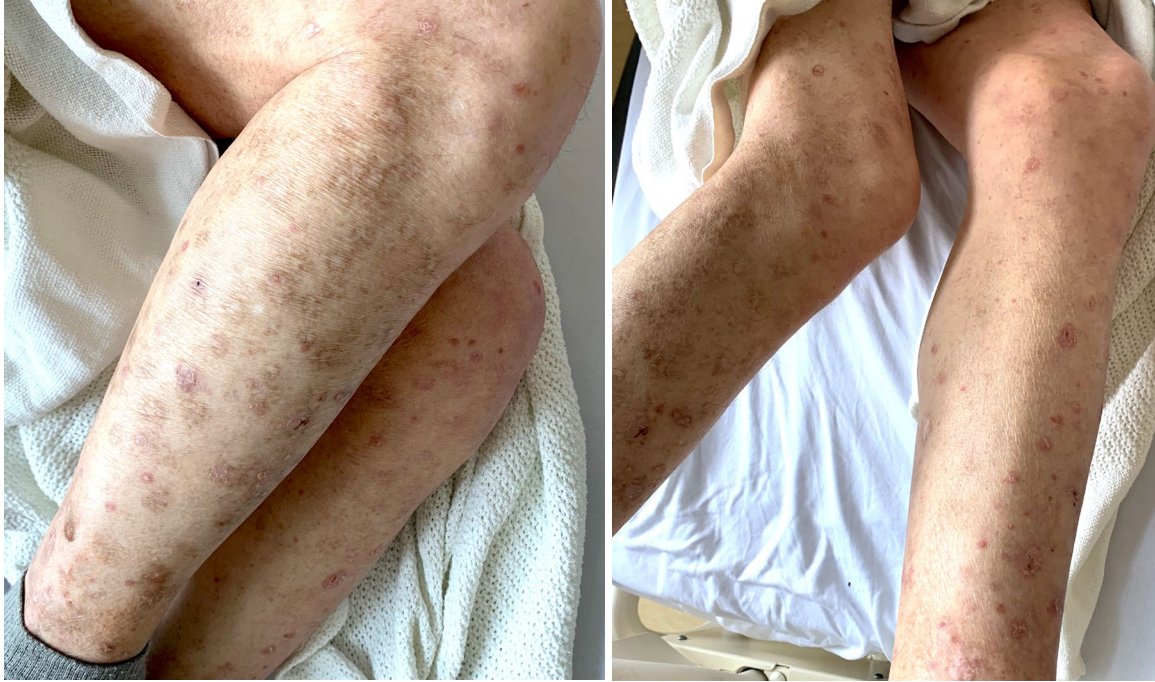

Supplement: 201170-case-2-at.pdf [file 201170-case-2-at.pdf]
